# Supplementary material for: Use and Customization of Risk Scores for Predicting Cardiovascular Events Using Electronic Health Record Data
Source: PubMed Central journal article supplement — J Am Heart Assoc. 2017 Apr 24;6(4):e003670. doi: 10.1161/JAHA.116.003670 (PMC5532984; doi:10.1161/jaha.116.003670), 2017-04-24
Supplement: JAH3-6-e003670-s001.pdf [file JAH3-6-e003670-s001.pdf]

## SUPPLEMENTAL MATERIAL

**Supplemental Table 1. Subject characteristics from Electronic Health Record data used to construct risk models in this study**

|                                       | <b>EHR<br/>(n = 42,058)</b> | <b>Framingham Original Cohort*<br/>(n = 8,491)</b> | <b>Pooled Cohort+<br/>(n = 24,626)</b> |
|---------------------------------------|-----------------------------|----------------------------------------------------|----------------------------------------|
| <b>Sex</b>                            |                             |                                                    |                                        |
| Male                                  | 17,481 (41%)                | 3,969 (47%)                                        | 10,745 (44%)                           |
| Female                                | 24,577 (58%)                | 4,522 (53%)                                        | 13881 (56%)                            |
| <b>Race</b>                           |                             |                                                    |                                        |
| White                                 | 30,667 (73%)                | N/A                                                | 20,338 (83%)                           |
| Black                                 | 2,908 (6.9%)                | N/A                                                | 4,288 (17%)                            |
| Other or Not Reported                 | 8,483 (20.2%)               | N/A                                                | 0 (0%)                                 |
| <b>Age (years)</b>                    | 52 (9)                      | 49 (11)                                            | 56 (6)                                 |
| <b>SBP (mmHg)</b>                     | 123 (13)                    | 128 (19)                                           | 126 (18)                               |
| <b>HDL (mg/dL)</b>                    | 48 (12)                     | 52 (14)                                            | 52 (15)                                |
| <b>Total Cholesterol (mg/dL)</b>      | 194 (28)                    | 214 (42)                                           | 215 (41)                               |
| <b>Smoking</b>                        |                             |                                                    |                                        |
| Never/Former                          | 35,557 (84%)                | 5,545 (65%)                                        | 18,316 (74%)                           |
| Current                               | 6,501 (15%)                 | 2,946 (35%)                                        | 6,310 (26%)                            |
| <b>Diabetes</b>                       |                             |                                                    |                                        |
| No                                    | 38,157 (91%)                | 8,063 (95%)                                        | 22,390 (91%)                           |
| Yes                                   | 3,901 (9%)                  | 428 (5%)                                           | 2,236 (9%)                             |
| <b>Taking BP-lowering medications</b> |                             |                                                    |                                        |
| No                                    | 29,284 (70%)                | 7,557(89%)                                         | 19,416 (79%)                           |
| Yes                                   | 12,774 (30%)                | 934 (11%)                                          | 5,210 (21%)                            |

Framingham Original Cohort (used to construct the Original Framingham Risk Score (FRS)), and Pooled Cohort data (used to construct the Original Pooled Cohort Equations (PCE)). Entries are given as N (%) or Mean (SD). EHR = Electronic Health Record

\* Summarized from Table 1 at <http://circ.ahajournals.org/content/117/6/743/tab-figures-data>

+ Summarized from Table 2 at

[http://circ.ahajournals.org/highwire/filestream/47233/field\\_highwire\\_adjunct\\_files/0/Risk\\_Assessment\\_Full\\_Work\\_Group\\_Report.doc](http://circ.ahajournals.org/highwire/filestream/47233/field_highwire_adjunct_files/0/Risk_Assessment_Full_Work_Group_Report.doc)

Supplemental Table 2. Original and Refitted coefficients and baseline risk for Framingham Risk Score Cox regression models

| Variables                                          | Original FRS  |               | Refitted FRS  |               |
|----------------------------------------------------|---------------|---------------|---------------|---------------|
|                                                    | Males         | Females       | Males         | Females       |
|                                                    | $\hat{\beta}$ | $\hat{\beta}$ | $\hat{\beta}$ | $\hat{\beta}$ |
| Log(Age)                                           | 3.06          | 2.33          | <b>3.75</b>   | <b>4.44</b>   |
| Log(Total Cholesterol)                             | 2.12          | 1.21          | <b>0.23</b>   | <b>-0.07</b>  |
| Log(HDL)                                           | -0.93         | -0.71         | <b>-0.54</b>  | <b>-0.47</b>  |
| Log(Untreated SBP)                                 | 1.93          | 2.76          | 2.15          | <b>2.13</b>   |
| Log(Treated SBP)                                   | 2.00          | 2.82          | 2.20          | <b>2.20</b>   |
| Smoker (Yes/No)                                    | 0.65          | 0.53          | 0.56          | <b>0.71</b>   |
| Diabetes (Yes/No)                                  | 0.57          | 0.69          | 0.45          | <b>0.51</b>   |
| <b>Average <math>\sum \hat{\beta}_i x_i</math></b> | 23.98         | 26.19         | 24.56         | 25.80         |
| <b>Baseline risk</b>                               | 0.049         | 0.021         | 0.046         | 0.026         |

FRS = Framingham Risk Score

Bolded coefficients in the Refitted FRS are those which differ significantly ( $p < 0.05$ ) from the corresponding Original FRS coefficient.

Supplemental Table 3: Coefficients for Original and Refitted Pooled Cohort Equations models (White females)

| Covariates                        | Original PCE  | Refitted PCE  |
|-----------------------------------|---------------|---------------|
|                                   | $\hat{\beta}$ | $\hat{\beta}$ |
| Log(Age)                          | -29.80        | -24.49        |
| Log(Age), Squared                 | 4.88          | 4.22          |
| Log(Total Cholesterol )           | 13.54         | 8.3           |
| Log(Total Cholesterol) x Log(Age) | -3.11         | -1.83         |
| Log(HDL)                          | -13.58        | -4.87         |
| Log(HDL) x Log(Age)               | 3.15          | 1.07          |
| Log(Treated SBP)                  | 2.02          | 2.23          |
| Log(Untreated SBP)                | 1.96          | 2.16          |
| Smoker (Yes/No)                   | 7.57          | 3.8           |
| Smoker x Log(Age)                 | -1.67         | -0.75         |
| Diabetes (Yes/No)                 | 0.66          | 0.42          |
| Average $\sum \hat{\beta}_i x_i$  | -29.18        | -16.95        |
| Baseline risk                     | 0.011         | 0.013         |

PCE = Pooled Cohort Equations

Supplemental Table 4: Coefficients for Original and Refitted Pooled Cohort Equations models (White males)

| Covariates                        | Original PCE  | Refitted PCE  |
|-----------------------------------|---------------|---------------|
|                                   | $\hat{\beta}$ | $\hat{\beta}$ |
| Log(Age)                          | 12.344        | 8.15          |
| Log(Total Cholesterol )           | 11.853        | 6.09          |
| Log(Total Cholesterol) x Log(Age) | -2.664        | -1.23         |
| Log(HDL)                          | -7.990        | -3.5          |
| Log(HDL) x Log(Age)               | 1.769         | 0.67          |
| Log(Treated SBP)                  | 1.797         | 1.67          |
| Log(Untreated SBP)                | 1.764         | 1.6           |
| Smoker (Yes/No)                   | 7.837         | 4.28          |
| Smoker x Log(Age)                 | -1.795        | -0.9          |
| Diabetes (Yes/No)                 | 0.658         | 0.35          |
| Average $\sum \hat{\beta}_i x_i$  | 61.18         | 43.50         |
| Baseline risk                     | 0.0374        | 0.027         |

PCE = Pooled Cohort Equations

Supplemental Table 5: Coefficients for Original and Refitted Pooled Cohort Equations models (Black females)

| Covariates                                         | Original PCE  | Refitted PCE  |
|----------------------------------------------------|---------------|---------------|
|                                                    | $\hat{\beta}$ | $\hat{\beta}$ |
| Log(Age)                                           | 17.114        | 2.74          |
| Log(Total Cholesterol )                            | 0.940         | 0.1           |
| Log(HDL)                                           | -18.920       | 0.05          |
| Log(HDL) x Log(Age)                                | 4.475         | NA*           |
| Log(Treated SBP)                                   | 29.291        | 2.63          |
| Log(Treated SBP) x Log(Age)                        | -6.432        | NA*           |
| Log(Untreated SBP)                                 | 27.820        | 2.51          |
| Log(Untreated SBP) x Log(Age)                      | -6.087        | NA*           |
| Smoker (Yes/No)                                    | 0.691         | -0.75         |
| Diabetes (Yes/No)                                  | 0.874         | 0.41          |
| <b>Average <math>\sum \hat{\beta}_i x_i</math></b> | 86.61         | 23.71         |
| <b>Baseline risk</b>                               | 0.018         | 0.014         |

PCE = Pooled Cohort Equations

\* Terms omitted from Cox model due to full model not converging when fit to given data.

Supplemental Table 6: Coefficients for Original and Refitted Pooled Cohort Equations models (Black males)

| Covariates                                         | Original PCE  | Refitted PCE  |
|----------------------------------------------------|---------------|---------------|
|                                                    | $\hat{\beta}$ | $\hat{\beta}$ |
| Log(Age)                                           | 2.469         | 4.4           |
| Log(Total Cholesterol )                            | 0.302         | -1.77         |
| Log(HDL)                                           | -0.307        | -0.6          |
| Log(Treated SBP)                                   | 1.916         | 5.62          |
| Log(Untreated SBP)                                 | 1.809         | 5.65          |
| Smoker (Yes/No)                                    | 0.549         | 0.53          |
| Diabetes (Yes/No)                                  | 0.645         | -0.04         |
| <b>Average <math>\sum \hat{\beta}_i x_i</math></b> | 19.54         | 33.08         |
| <b>Baseline risk</b>                               | 0.043         | 0.020         |

PCE = Pooled Cohort Equations

Supplemental Table 7. Calibration and Discrimination of Original Framingham Risk Score and Pooled Cohort Equations models, for subpopulations defined by statin use and race.

|                                                   | FRS*                   |                        | PCE <sup>+</sup>       |                        |
|---------------------------------------------------|------------------------|------------------------|------------------------|------------------------|
|                                                   | Original               | Refitted               | Original               | Refitted               |
| <b>Non-statin users (N = 35,281<sup>^</sup>)</b>  |                        |                        |                        |                        |
| <b>Calibration statistic (p-value)</b>            | 9.2<br>(0.03)          | 4.7<br>(0.2)           | 26.4<br>(<0.001)       | 8.4<br>(0.04)          |
| <b>C-index (95% CI)</b>                           | 0.742<br>(0.724-0.759) | 0.758<br>(0.740-0.776) | 0.754<br>(0.730-0.778) | 0.753<br>(0.729-0.777) |
| <b>Whites and blacks (N = 33,742<sup>^</sup>)</b> |                        |                        |                        |                        |
| <b>Calibration statistic (p-value)</b>            | 9.3<br>(0.03)          | 5.1<br>(0.17)          | 37.0<br>(<0.001)       | 15.7<br>(0.001)        |
| <b>C-index (95% CI)</b>                           | 0.738<br>(0.722-0.754) | 0.751<br>(0.735-0.767) | 0.745<br>(0.723-0.767) | 0.744<br>(0.721-0.766) |
| <b>Blacks only (N = 2,875<sup>^</sup>)</b>        |                        |                        |                        |                        |
| <b>Calibration statistic (p-value)</b>            | 8.4<br>(0.04)          | 9.2<br>(0.03)          | 2.8<br>(0.42)          | 20.3<br>(<0.001)       |
| <b>C-index (95% CI)</b>                           | 0.699<br>(0.640-0.758) | 0.703<br>(0.644-0.762) | 0.725<br>(0.639-0.810) | 0.696<br>(0.610-0.782) |

PCE = Pooled Cohort Equations, FRS = Framingham Risk Score

\* = Using FRS definition of CV events

+ = Using PCE definition of CV events

<sup>^</sup> = Number of individuals in the test set used to evaluate predictions. Due to the 50/50 training test split, this is also the number of individuals among the N = 42,058 in the training set (distinct from the test set) used to refit the FRS and PCE models.

**Supplemental Table 8. Results of a logistic regression evaluating the association between baseline characteristics and whether end of follow-up was due to disenrollment, among patients with less than 5 years of follow-up.**

|                           | <b>Odds Ratio</b> | <b>P-value</b> |
|---------------------------|-------------------|----------------|
| <b>(Intercept)</b>        | 0.000             | <0.01          |
| <b>Year of Enrollment</b> | 1.589             | <0.01          |
| <b>Race (Other)</b>       | 1.393             | 0.16           |
| <b>Race (White)</b>       | 4.590             | <0.01          |
| <b>Hispanic</b>           | 1.190             | 0.74           |
| <b>Female</b>             | 0.862             | 0.18           |
| <b>Age</b>                | 1.008             | 0.19           |
| <b>SBP</b>                | 1.001             | 0.79           |
| <b>BMI</b>                | 0.994             | 0.54           |
| <b>HDL</b>                | 1.005             | 0.29           |
| <b>TC</b>                 | 1.000             | 0.82           |
| <b>Current Smoker</b>     | 0.992             | 0.91           |
| <b>Has Diabetes</b>       | 0.891             | 0.53           |
| <b>Taking SBP Meds</b>    | 1.054             | 0.67           |
| <b>Taking a Statin</b>    | 1.203             | 0.20           |

SBP = Systolic Blood Pressure, BMI = Body Mass Index, HDL = High Density Lipoprotein, TC = Total Cholesterol
